# Supplementary material for: A self-assembled albumin based multiple drug delivery nanosystem to overcome multidrug resistance
Source: Royal Society of Chemistry journal article supplement (doi:10.1039/c4ra12802h), 2014-12-23
Supplement: c4ra12802h1.pdf [file c4ra12802h1.pdf]

## Supporting Information

### **A self-assembled albumin based multiple drug delivery nanosystem to overcome multidrug resistance**

Bin Chen, Cong Wu, Ren-Xi Zhuo and Si-Xue Cheng\*

*Key Laboratory of Biomedical Polymers of Ministry of Education, Department of Chemistry, Wuhan University, Wuhan 430072, People's Republic of China*

## Study on the interaction between BSA and drugs by fluorescence spectroscopy

After the co-incubation of the drug (DOX or VER) with BSA, drug molecules bind to BSA act as quenchers. The quenching reaction between the drug (quencher, Q) and BSA (protein, B) is shown as follows:

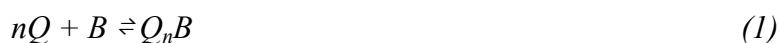

where  $n$  is the number of drug molecules bound to the residue with intrinsic fluorescence in BSA.  $Q_nB$  is the non fluorescent fluorophore–quencher complex.

The association constant,  $K_A$ , can be calculated as:

$$K_A = [Q_nB]/([Q]^n[B]) \quad (2)$$

$$[Q_nB] = [B_0] - [B] \quad (3)$$

where  $[B_0]$  is total protein concentration.

$$K_A = ([B_0] - [B])/[Q]^n[B] \quad (4)$$

$$[B]/[B_0] = F/F_0 \quad (5)$$

where  $F_0$  is initial fluorescence intensity and  $F$  is fluorescence intensity in the presence of the quenching agent.

From Equations 4 and 5, we can obtain

$$\log[(F_0 - F)/F] = \log K_A + n \log[Q] \quad (6)$$

By plotting  $\log[(F_0 - F)/F]$  vs  $\log[Q]$ ,  $n$  can be determined. For both DOX and VER,  $n$  values are approximately equal to 1.

***In vitro* cytotoxicity of verapamil**

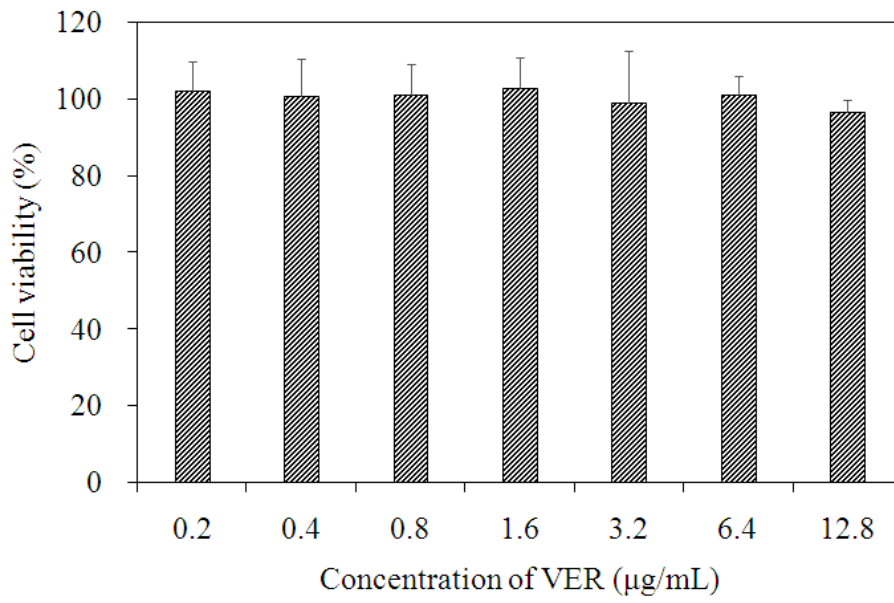

**A**

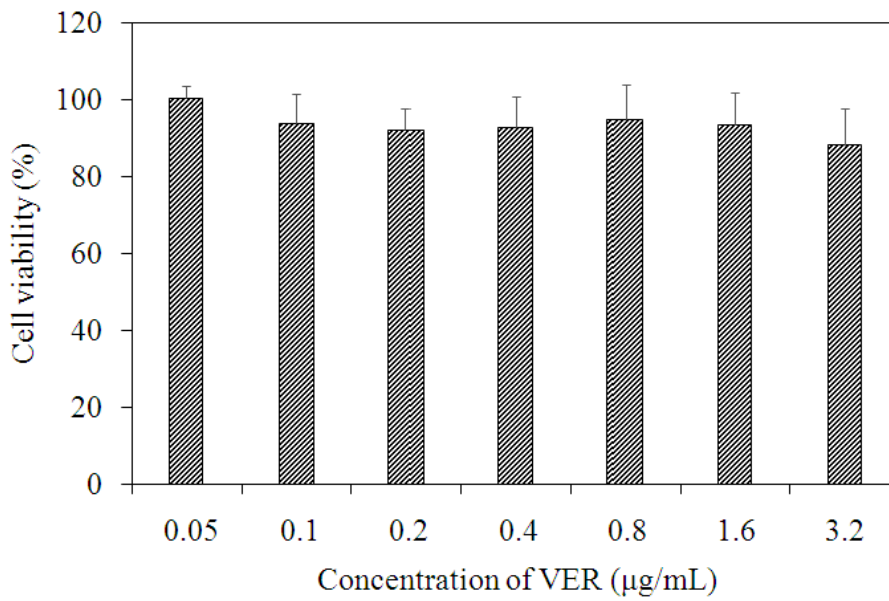

**B**

Figure S1. Cell viability of HCT-15 cells (A) and 293T cells (B) after being treated by free verapamil (VER) for 48 h.

### Study on cellular internalization by fluorescent microscopy

1 mL of HCT-15 cells were seeded at a density of  $1 \times 10^5$  cells/mL in a glass-bottomed dish and incubated at 37 °C for 24 h to form a confluent monolayer. Then the culture medium was changed with 1 mL of fresh medium containing a particular agent containing 3.2  $\mu\text{g}$  of DOX (free DOX, DOX/BSA nanoparticles and DOX/VER/BSA nanoparticles, respectively) and incubated at 37 °C for 2 h. Then the cells were washed with PBS three times and the cell nuclei were stained with Hoechst 33342 solution for 20 min. Subsequently, the cells were washed with PBS three times and then incubated with 1 mL of PBS. The cells were visualized on a fluorescent microscope.

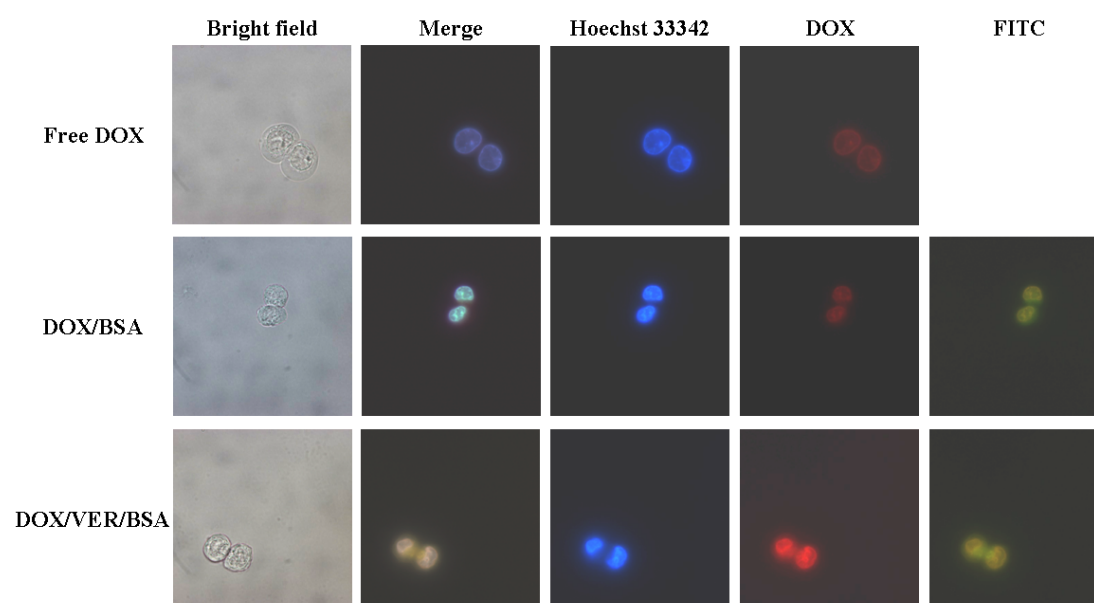

Figure S2. Fluorescent microscopy images of HCT-15 cells after being treated by free DOX, DOX/BSA nanoparticles and DOX/VER/BSA nanoparticles for 2 h. The cell nuclei were stained with Hoechst 33342. BSA was labeled by FITC. The cells were treated by a particular agent with a DOX concentration of 3.2  $\mu\text{g}/\text{mL}$ .
